# Supplementary material
Source: HighWire-hosted journal article supplement (https://jnm.snmjournals.org/highwire/filestream/93850/field_highwire_adjunct_files/0/jnm087999_Supplemental_data.pdf)
Supplement: jnm087999_Supplemental_data.pdf [file jnm087999_Supplemental_data.pdf]

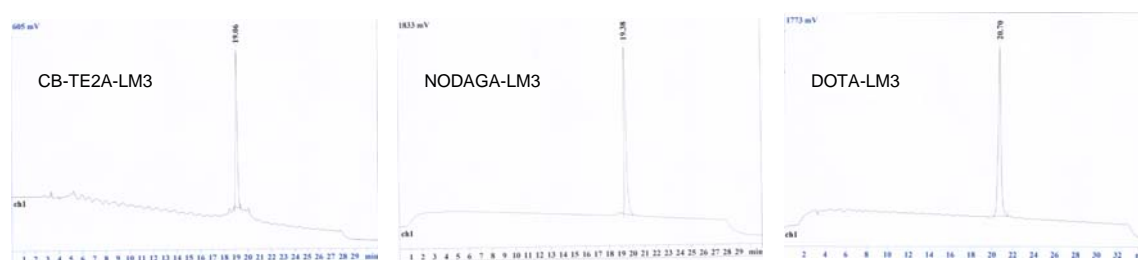

**SUPPLEMENTAL FIGURE 1.** Analytical reversed-phase high-performance liquid chromatography (RP-HPLC) profile of the conjugates CB-TE2A-LM3, NODAGA-LM3 and DOTA-LM3. UV absorbance was monitored at 214 nm. RP-HPLC was carried out on a Hewlett Packard 1050 HPLC system equipped with a multiwavelength detector and a flow-through Berthold LB506C1  $\gamma$ -detector. The gradient system consisted of 0.1% trifluoroacetic acid in water (A) and acetonitrile (B) (0-25 min 95-50% A) at a flow rate of 0.75 mL/min on a CC250/4 Nucleosil 120-3C18 column from Macherey-Nagel.

A

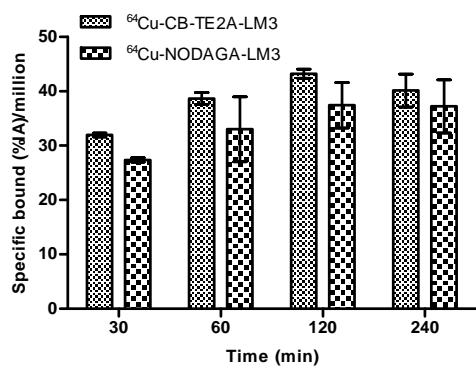

B

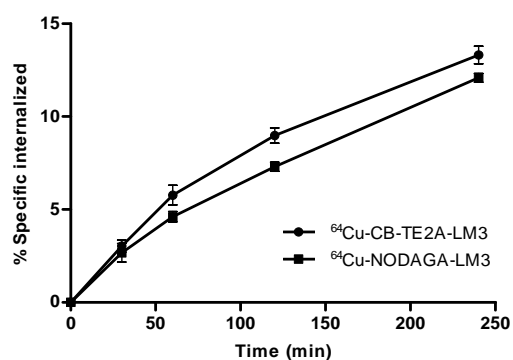

**SUPPLEMENTAL FIGURE 2.** *In vitro* surface bound (A) and internalization rate (B) of  $^{64}\text{Cu}$ -CB-TE2A-LM3 and  $^{64}\text{Cu}$ -NODAGA-LM3 into HEK-sst2 cells within 4 h at 37°C, expressed as specific bound and internalization; bars  $\pm$  SD (n = 3).

**SUPPLEMENTAL TABLE 1.** Analytical data of the synthesized compounds.

| Compound                             | Molecular formula                                                                 | Calculated mass | Observed mass (m/z) <sup>1</sup> | Retention Time (min) <sup>2</sup> |
|--------------------------------------|-----------------------------------------------------------------------------------|-----------------|----------------------------------|-----------------------------------|
| Fmoc-D-4-amino-Phe-carbamoyl(tBu)-OH | C <sub>30</sub> H <sub>33</sub> N <sub>3</sub> O <sub>4</sub>                     | 501.4           | 502.5 [M+H] <sup>+</sup>         | nd                                |
| CB-TE2A-LM3                          | C <sub>69</sub> H <sub>97</sub> N <sub>16</sub> O <sub>15</sub> S <sub>2</sub> Cl | 1490.9          | 1492.6 [M+H] <sup>+</sup>        | 19.06                             |
| NODAGA-LM3                           | C <sub>68</sub> H <sub>92</sub> N <sub>15</sub> O <sub>19</sub> S <sub>2</sub> Cl | 1522.6          | 761.9 [M+2H] <sup>2+</sup>       | 19.38                             |
| DOTA-LM3                             | C <sub>69</sub> H <sub>93</sub> N <sub>16</sub> O <sub>19</sub> S <sub>2</sub> Cl | 1552.0          | 1591.2 [M+ K] <sup>+</sup>       | 20.70                             |

<sup>1</sup> Electrospray ionisation-mass spectrometry (ESI-MS) was carried out with a Finnigan SSQ 7000 spectrometer (Bremen, Germany).

<sup>2</sup> Analytical reversed-phase high-performance liquid chromatography (RP-HPLC) was carried out using a gradient system consisted of 0.1% trifluoroacetic acid in water (A) and acetonitrile (B) (0-25 min 95-50% A) at a flow rate of 0.75 mL/min on a CC250/4 Nucleosil 120-3C18 column from Macherey-Nagel.
